# From Easy to Hopeless - Predicting the Difficulty of Phylogenetic Analyses

Julia Haag,<sup>\*,1</sup> Dimitri Höhler,<sup>1</sup> Ben Bettisworth,<sup>1</sup> and Alexandros Stamatakis<sup>1,2</sup>

<sup>1</sup>Computational Molecular Evolution Group, Heidelberg Institute for Theoretical Studies, Heidelberg, Germany

<sup>2</sup>Institute for Theoretical Informatics, Karlsruhe Institute of Technology, Karlsruhe, Germany

\*Corresponding author: E-mail: [julia.haag@h-its.org](mailto:julia.haag@h-its.org)

## Abstract

Phylogenetic analyses under the Maximum Likelihood model are time and resource intensive. To adequately capture the vastness of tree space, one needs to infer multiple independent trees. On some datasets, multiple tree inferences converge to similar tree topologies, on others to multiple, topologically highly distinct yet statistically indistinguishable topologies. At present, no method exists to quantify and predict this behavior. We introduce a method to quantify the degree of difficulty for analyzing a dataset and present Pythia, a Random Forest Regressor that accurately predicts this difficulty. Pythia predicts the degree of difficulty of analyzing a dataset *prior* to initiating Maximum Likelihood based tree inferences. Pythia can be used to increase user awareness with respect to the amount of signal and uncertainty to be expected in phylogenetic analyses, and hence inform an appropriate (post-)analysis setup. Further, it can be used to select appropriate search algorithms for easy-, intermediate-, and hard-to-analyze datasets.

Key words: Phylogenetics, Maximum Likelihood, Machine Learning, Random Forest Regression

## 1 Introduction

2 The goal of a phylogenetic inference is to find 13 inference will converge to the *globally* optimal  
3 the phylogenetic tree that best explains the given 14 tree. Therefore, under ML, one typically infers  
4 biological sequence data. Since the number of 15 multiple trees and subsequently summarizes the  
5 possible tree topologies grows super-exponentially 16 inferred, *locally* optimal trees via a consensus  
6 with the number of taxa, one cannot compute 17 tree. One can observe that for some datasets, all  
7 and score every possible tree topology. Instead, 18 individual, independent ML tree searches converge  
8 one deploys tree inference heuristics that explore 19 to topologically similar trees. This suggests that  
9 the tree space to find a tree with a ‘good’ 20 the likelihood surface of such datasets exhibits  
10 score, for example under the Maximum Likelihood 21 a single likelihood peak, yielding the dataset  
11 (ML) criterion (Yang *et al.* 1995). However, 22 easy to analyze. For other datasets, one observes  
12 these heuristics do not guarantee that the tree 23 that the independent tree inferences converge to  
24 multiple topologically distinct, yet, with respect  
25 to their ML score, statistically indistinguishable,  
26 locally optimal trees. These datasets are hence

1 difficult to analyze, and we say that they exhibit 33 the ML tree inference software FastTree (Price  
2 a rugged likelihood surface. This diverse behavior 34 *et al.* 2010) relies on a maximum number of  
3 of phylogenetic tree searches has already been 35 topology optimization iterations as a function  
4 reported in several publications (Lakner *et al.* 36 of the number of sequences in the dataset.  
5 2008; Stamatakis 2011; Morel *et al.* 2020). In 37 The ML software RAxML (Stamatakis 2014)  
6 general, the more tree inferences we perform, the 38 implements an early-stopping criterion based on  
7 better our understanding of the dataset's behavior 39 the topological distance between the respective  
8 and coverage of the respective tree space will be. 40 best trees found in two consecutive optimization  
9 However, under ML, inferring a single tree can 41 cycles (Stamatakis 2011). Vinh and von Haeseler  
10 already require multiple hours or even days of 42 (2004) propose an estimation criterion that  
11 CPU time. In order to save time and resources, 43 determines with 95% confidence whether  
12 an optimal analysis setup will perform as few 44 continuing the tree inference will yield a better  
13 tree inferences as necessary. For easy-to-analyze 45 tree than the currently best tree. However, early  
14 datasets with a single likelihood peak, we require 46 stopping criteria only determine the convergence  
15 fewer and less involved tree search heuristics and 47 of the current tree search, but they do evidently  
16 bootstrap replicate searches to adequately sample 48 not guarantee that the search has converged  
17 the tree space, as opposed to difficult-to-analyze 49 to the globally optimal tree. Thus, to better  
18 datasets with rugged likelihood surfaces. To the 50 characterize and explore the tree search space,  
19 best of our knowledge, and despite anecdotal 51 additional tree inferences and subsequent a  
20 reports on the behavior of difficult datasets, there 52 posteriori analyses are required. In contrast,  
21 does not yet exist a *quantifiable* definition of 53 assessing the expected behavior of a dataset  
22 dataset difficulty that captures the behavior of ML 54 prior to conducting compute-intensive tree  
23 tree searches on datasets. 55 inferences allows for a more informed decision

24 In order to speedup ML tree inferences, 56 on the most appropriate tree inference and  
25 researchers have developed elaborate ML tree 57 post-analysis setup. It also allows users to  
26 inference tools that combine multiple search 58 reassemble/modify difficult datasets as these will  
27 strategies to reduce the risk of becoming 59 most likely require resource-intensive analyses  
28 stuck in local optima. There also exist early- 60 that yield contradicting, yet almost equally likely,  
29 stopping criteria to determine whether the tree 61 tree topologies with low confidence. Several  
30 inference has converged. Such early-stopping 62 methods have already been developed to assess  
31 methods deploy ad hoc or statistical criteria 63 the information content of datasets *prior* to  
32 to terminate the tree inference. For example, 64 tree inference, the most prominent example

## Phylogenetic Difficulty Prediction

---

1 being the treelikeness of a dataset (Bandelt and 33 Regressor (Ho 1995) that can predict the difficulty  
2 Dress 1992; Lyons-Weiler *et al.* 1996; White 34 of a given MSA that is exclusively based on MSA  
3 *et al.* 2007). Simple and fast-to-compute metrics 35 attributes and some fast and thus substantially  
4 include the sites-over-taxa ratio. For instance, 36 less expensive parsimony-based tree inferences  
5 Rosenberg and Kumar (2001) conclude that a 37 (Farris 1970; Fitch 1971). By extracting multiple  
6 higher phylogenetic inference accuracy can be 38 simple and fast-to-compute attributes, such as the  
7 achieved by increasing the MSA length, rather 39 sites-over-taxa ratio, and by deploying machine  
8 than including more taxa/sequences. A more 40 learning, we devise an accurate difficulty predictor  
9 involved method was proposed by Holland *et al.* 41 called *Pythia*. We attain a high prediction  
10 (2002). The authors suggest the use of  $\delta$ -plots, 42 accuracy, with a mean absolute prediction error  
11 that is histograms, based on all quartet distances 43 (MAE) of 0.09 and a mean absolute percentage  
12 in the Multiple Sequence Alignment (MSA). 44 error (MAPE) of 2.9%. Computing the prediction  
13 However, computing the  $\delta$ -plots is time-intensive 45 features and predicting the difficulty is on average  
14 due to the computational complexity of  $\mathcal{O}(n^4)$ , 46 approximately five times faster than a single ML  
15 where  $n$  is the number of taxa in the MSA. 47 tree inference. *Pythia* predicts the difficulty of a  
16 Misof *et al.* (2014) provide an overview of 48 dataset on a scale ranging between 0.0 (easy) to  
17 various methods for calculating the treelikeness, 49 1.0 (difficult).  
18 prior to a phylogenetic analysis. The authors 50 In contrast to the aforementioned early-  
19 acknowledge that the considered treelikeness 51 stopping criteria that can be applied during  
20 estimation methods capture certain aspects of the 52 ML searches, *Pythia* informs the user about the  
21 MSAs. However, they conclude that none of them 53 expected behavior of the MSA in ML phylogenetic  
22 sufficiently informs the user about the expected 54 analysis *prior* to any ML phylogenetic inference.  
23 behavior of phylogenetic analyses in general, and 55 Thereby, users can take informed decisions on  
24 suggest further research in this area. 56 the most appropriate ML analysis and post-

### 25 New Approach

26 Here, we initially introduce a quantification of 58 careful consideration of the number of required  
27 difficulty based on the result of 100 ML tree 59 independent, resource-intensive, tree searches  
28 inferences per MSA. We then show that this 60 based on the difficulty. Also, for difficult  
29 quantification adequately represents the behavior 61 MSAs, the user will be able to improve the  
30 of the ML searches on the dataset. Since 62 informativeness of the MSA, for example by  
31 executing 100 ML tree searches is computationally 63 increasing sequence length or removing sequences,  
32 prohibitive in general, we train a Random Forest 64 to assemble an MSA that is easier to analyze.

1 Thereby, one can save valuable time and resources 33 set is used for training the predictor and the  
2 by not performing tree inferences on difficult 34 test set is exclusively used for evaluating the  
3 MSAs. We therefore suggest that an analysis with 35 trained predictor. Pythia predicts the degree of  
4 Pythia should be conducted at the beginning 36 difficulty on a scale between 0.0 to 1.0. A value  
5 of any ML phylogenetic analysis. Note that the 37 of 1.0 indicates a difficult (hopeless) MSA with  
6 predicted difficulty does not directly predict the 38 a rugged tree space. We expect such an MSA  
7 number of tree inferences required to sufficiently 39 to exhibit multiple, statistically indistinguishable  
8 sample the tree space, as this number also depends 40 locally optimal yet topologically highly distinct  
9 on the implemented tree inference heuristic. 41 trees. In contrast, we expect an MSA with a  
10 Pythia is available as open source software 42 value of 0.0 to be easy to analyze by requiring  
11 libraries in C and Python. Both libraries include 43 only few independent tree searches. Pythia attains  
12 the trained Random Forest Regressor and the 44 a mean absolute error (MAE) of 0.09. This  
13 computation of the required prediction features. 45 corresponds to a mean average percentage error  
14 The C library CPythia is an addition to the 46 (MAPE) of 2.9%. The mean squared error (MSE)  
15 COre RAXml LIBrary (Coraxlib) (Exelixis-Lab 47 is 0.02 and the  $R^2$  score is 0.79. Supplementary  
16 2022) and is available at <https://github.com/> 48 Figures S5a and S5b show the distribution of  
17 [tschuelia/CPythia](https://github.com/tschuelia/CPythia). Additionally, we provide 49 prediction errors for the training data. When  
18 PyPythia, a lightweight, stand-alone Python 50 analyzing the prediction error, we notice that  
19 library, including a respective command line 51 Pythia tends to overestimate the difficulty of  
20 interface. PyPythia is available at <https://> 52 MSAs with a difficulty  $\leq 0.3$  and underestimate  
21 [github.com/tschuelia/PyPythia](https://github.com/tschuelia/PyPythia). Finally, by 53 the difficulty for MSAs with a difficulty  $> 0.3$   
22 using the phylogenetic tree data that is being 54 (Supplementary Figure S4). We suspect that this  
23 collected by our dynamically growing RAXML 55 is caused by an uneven distribution of difficulties  
24 Grove (Höhler *et al.* 2021) database, we regularly 56 in the training data. Our training data contains  
25 retrain Pythia and update the predictor in both 57 substantially more ‘easy’ MSAs than difficult  
26 libraries. 58 MSAs: for approximately 60% of MSAs the  
27 **Results** 59 assigned difficulty is  $\leq 0.3$  and only about 10%  
28 Difficulty Prediction Accuracy 60 have a difficulty  $\geq 0.7$  (Supplementary Figure S2).  
29 Our training data contains 3250 empirical MSAs 61 Feature Importance  
30 obtained from TreeBASE (Piel *et al.* 2000). 62 In our study, we analyze a plethora of distinct  
31 We divide this training data into a *training* 63 features of the MSA, of trees inferred under  
32 *set* (80%) and a *test set* (20%). The training 64 parsimony, and features based on a single ML tree

## Phylogenetic Difficulty Prediction

---

1 inference using RAxML-NG. In order to decrease  
2 the runtime of Pythia's difficulty prediction, we  
3 analyze the runtime of computing each feature  
4 for all MSAs in our training data, as well as the  
5 importance of the feature for the prediction. Based  
6 on these results, we selected a subset of eight  
7 features:

- Sites-over-taxa ratio:

$$\frac{\# \text{ Sites}}{\# \text{ Taxa}} = \frac{\text{Number of alignment columns}}{\text{Number of taxa}}$$

- Patterns-over-taxa ratio:

$$\frac{\# \text{ Patterns}}{\# \text{ Taxa}} = \frac{\text{Number of unique sites}}{\text{Number of taxa}}$$

- 8 • % Invariant sites: Percentage of fully conserved  
9 sites.
- 10 • % Gaps: Proportion of gaps in the MSA.
- 11 • Entropy: Shannon Entropy (Shannon 1948)  
12 as average over all per-column/site entropies.  
13 See the supplementary information for a more  
14 detailed description.
- 15 • Bollback Multinomial: Multinomial test  
16 statistic according to Bollback (Bollback 2002).  
17 See the supplementary information for a more  
18 detailed description.
- 19 • RF-Distance Parsimony Trees: RF-Distances  
20 between 100 trees inferred using parsimony.
- 21 • % Unique Topologies Parsimony Trees:  
22 Percentage of unique topologies among the 100  
23 inferred parsimony trees.

24 Four of these are direct attributes of the  
25 MSA: the sites-over-taxa ratio, the patterns-  
26 over-taxa ratio, the percentage of gaps, and

27 the percentage of invariant sites. Two features  
28 quantify the amount of information in the  
29 MSA: the Shannon entropy (Shannon 1948)  
30 and the Bollback multinomial (Bollback 2002).  
31 Two additional features are based on rapid  
32 parsimony tree inferences: we infer 100 parsimony  
33 trees via a randomized step-wise addition order  
34 procedure and compute their average pair-wise  
35 topological distances using the Robinson-Foulds  
36 distance metric (RF-Distance) (Robinson and  
37 Foulds 1981), as well as the proportion of unique  
38 topologies in this set of 100 parsimony trees.  
39 In Supplementary Information Section 2, we  
40 present all features we considered and analyzed  
41 in more detail, alongside the respective feature  
42 importance and runtime to justify the selection  
43 of the eight features we finally use. Table 1 shows  
44 the prediction importances of the eight features  
45 upon which the difficulty prediction is based. We  
46 use the permutation importance (Breiman 2001)  
47 for computing feature importance. As the table  
48 shows, the difficulty prediction heavily relies on  
49 the average RF-Distance and the proportion of  
50 unique topologies among the inferred parsimony  
51 trees. This is expected, as our difficulty definition  
52 under ML reflects the ruggedness of the tree space  
53 and correlates well with the ruggedness under  
54 parsimony.

### Runtime of Feature Computation

55 Computing the selected set of prediction features  
56 takes on average  $5 \pm 31$  s ( $\mu \pm \sigma$ ) with a median  
57 runtime of 1s. For our training data, this  
58

**Table 1.** Importance of the subset of features we use to train Pythia.

| Feature                             | Impurity importance |
|-------------------------------------|---------------------|
| % Unique topologies parsimony trees | 42.9 %              |
| RF-Distance parsimony trees         | 33.2 %              |
| Entropy                             | 17.0 %              |
| Patterns-over-taxa                  | 13.6 %              |
| % Gaps                              | 2.5 %               |
| Bollback                            | 2.3 %               |
| Sites-over-taxa                     | 1.5 %               |
| % Invariant                         | 0.6 %               |

1 corresponds to a runtime of  $21.5 \pm 88.6\%$  relative  
2 to the runtime for inferring a single ML tree  
3 using RAxML-NG. The median is 6.8%. The high  
4 average compared to the median, and the large  
5 spread, are due to the fact that the runtime of  
6 computing the prediction features predominantly  
7 depends on the size of the MSA. The larger  
8 the MSA, the faster the feature computation  
9 is compared to a single ML tree inference.  
10 Supplementary Figure S3 depicts this correlation.  
11 For benchmarking the runtimes of the feature  
12 computation, we used the implementation in our  
13 Python library. When running a subsequent ML  
14 tree inference, the runtime overhead induced by  
15 the prediction can be amortized by passing the  
16 inferred maximum parsimony trees as starting  
17 trees to the ML inference tool (e.g. RAxML-NG).  
18 Instead of re-computing parsimony starting trees,  
19 the RAxML-NG simply initiates its tree searches  
20 on the provided parsimony starting trees.

## 21 Discussion

22 Predicting the difficulty of MSAs to gain a  
23 priori insights into the expected behavior of

24 phylogenetic tree searches and the shape of  
25 the likelihood surface constitutes a vital step  
26 towards faster phylogenetic inference and a more  
27 targeted setup of the computational analyses  
28 and post-analyses. Our difficulty prediction allows  
29 for careful consideration of the number of tree  
30 inference required to sufficiently sample tree space  
31 *prior* to ML analyses. Especially for easy MSAs,  
32 this has the potential to save valuable time  
33 and resources. In this paper, we presented a  
34 quantifiable definition of difficulty for MSAs and  
35 showed that this definition adequately represents  
36 the ruggedness of the tree space of the dataset  
37 under ML. Using this definition, we trained  
38 Pythia, a Random Forest Regressor, to predict the  
39 difficulty on a scale ranging between 0.0 to 1.0.  
40 We showed that Pythia achieves a high prediction  
41 accuracy. We further showed that the runtime to  
42 compute the prediction features is on average only  
43 approximately one fifth of the runtime required  
44 for inferring a single ML tree with RAxML-  
45 NG. The more taxa and sites the MSA has,  
46 the faster the feature computation is relative  
47 to a single ML tree inference, making Pythia  
48 especially valuable for phylogenetic analyses on  
49 MSAs with many sites and taxa. We conclude that  
50 predicting the difficulty of an MSA prior to any  
51 tree inference allows for faster analyses, informing  
52 user expectations regarding the stability of the  
53 inferred tree, and Pythia should be included in ML  
54 phylogenetic inference pipelines. As a cautionary  
55 note, we emphasize that the ruggedness of the

## Phylogenetic Difficulty Prediction

---

1 tree space might also depend on the model and 33 MSAs require a more careful consideration of  
2 tree inference heuristic being used. Yet, the fact 34 necessary additional phylogenetic analyses and  
3 that Pythia relies on parsimony trees to predict 35 post-processing steps. Especially for very difficult  
4 the ruggedness of ML trees shows that there 36 MSAs (difficulty  $>0.8$ ) we suggest to consider  
5 exists a correlation between models regarding 37 improving upon the difficulty of the MSA prior  
6 the ruggedness of the tree space and thus, the 38 to analysis. This is because a phylogenetic analysis  
7 difficulty of the analysis. 39 on very difficult MSAs, will most likely not yield a

8 Using our dynamically growing RAxML Grove 40 well-resolved tree, even if a consensus of numerous  
9 database, we perpetually enlarge our training data 41 almost equally likely yet topologically distinct ML  
10 and retrain Pythia at regular intervals. The goal 42 trees is built. Pythia is not intended to directly  
11 of this retraining is to continuously improve the 43 predict the number of independent tree searches  
12 predictive power of Pythia by providing more, and 44 required for conducting a thorough ML analysis,  
13 more diverse data in terms of the distribution 45 as this number also heavily depends on the search  
14 of feature values. At the time of writing this 46 strategy of the respective ML inference tool.

15 paper, the difficulty labels in our training data 47 Future Work  
16 are unevenly distributed. Since we carefully select 48 Potential future applications of Pythia include,  
17 the new MSAs from RAxML Grove we include for 49 for instance, the assembly of benchmark datasets  
18 retraining (see Section Retraining the Model), we 50 which cover a broad and representative difficulty  
19 expect the effect of uneven label distribution to 51 range for testing novel phylogenetic models and  
20 cancel out over time. 52 tools. Pythia can also serve as a criterion

21 Use and Misuse of Pythia 53 during the empirical dataset assembly process. For  
22 We suggest predicting the difficulty using Pythia 54 instance, additional sequence data can be added  
23 prior to any ML phylogenetic inference, as this 55 to yield a dataset that is easier to analyze.

24 will allow for more targeted analysis setups. 56 Another avenue for future work is to implement  
25 For example, for a difficult MSA, the user 57 a difficulty-aware tree inference heuristic.  
26 should be careful to report a single ML tree 58 Depending on the difficulty of the MSA, we  
27 as best-known tree, as the tree space most 59 can, for example, apply different heuristic search  
28 likely exhibits multiple, indistinguishable local 60 strategies. For instance, on easy MSAs it might  
29 optima. The user should also be aware that a 61 be sufficient to explore the tree space via a  
30 more difficult MSA requires a higher number 62 less thorough exploration strategy, that is, by  
31 of independent tree searches to construct a 63 only using Nearest-Neighbor-Interchange (NNI)  
32 reliable consensus tree. Furthermore, difficult 64 moves. In comparison to Subtree Pruning and

1 Regrafting (SPR) moves, this reduces the tree 33 *MCMC Convergence Prediction*  
2 topology search complexity from  $\mathcal{O}(n^2)$  to  $\mathcal{O}(n)$  34 The features we use to predict the difficulty of  
3 (Heath and Ramakrishnan 2010). 35 an MSA are independent of the inference method  
4 In our study, we focused on predicting the 36 used for the subsequent analyses. However, as  
5 difficulty of ML phylogenetic inferences. Another 37 we describe in the Quantification of Difficulty  
6 popular method to explore the tree space of an 38 subsection, our difficulty quantification is based  
7 MSA is Markov chain Monte Carlo (MCMC) 39 on 100 tree inferences using RAxML-NG which  
8 based Bayesian phylogenetic inference. Since both 40 implements the ML method. Therefore, our  
9 methods, ML and MCMC, rely on the same 41 predictions might be biased towards ML analyses  
10 input MSA and on the same likelihood function, 42 and potentially not describe the ruggedness  
11 we suspect the difficulty to be reflected in the 43 of the tree space in a model-independent  
12 apparent convergence speed of MCMC methods. 44 manner. To assess if our predictions can be  
13 In this section, we will explore this potential 45 generalized, we compare our difficulty prediction  
14 correlation on three exemplary MSAs. 46 to convergence diagnostics of MCMC based  
15 Besides informing the computational setup 47 phylogenetic analyses. For three DNA MSAs  
16 of ML phylogenetic analyses, Pythia can also 48 (D27 (Hedges *et al.* 1990), D125 (Poulakakis  
17 potentially be applied to adjust user expectations 49 and Stamatakis 2010), and D354 (Grimm *et al.*  
18 regarding the bootstrap support of the best- 50 2006)) we perform MCMC analysis using MrBayes  
19 known tree as well as related support measures. 51 (Ronquist *et al.* 2012). We run four chains  
20 For instance, the perhaps most common and 52 for 10 million generations each using the  
21 recurrent user inquiry on the RAxML Google user 53 general time reversible (GTR) model with four  
22 support group concerns possible reasons for often 54  $\Gamma$  rate categories to account for among site  
23 unexpected and disappointingly low bootstrap 55 rate heterogeneity. MrBayes reports the average  
24 support values. In this section, we also present 56 standard deviation of split frequencies (ASDSF;  
25 an exploratory analysis of the correlation between 57 split frequencies: relative number of occurrence  
26 the difficulty as predicted by Pythia, and the 58 of splits/bipartitions in the set of posterior  
27 bootstrap support values for three MSAs. 59 trees) as a convergence diagnostic metric and  
28 Since both, MCMC phylogenetic analyses 60 suggests executing additional generations as long  
29 and bootstrap analyses, constitute extremely 61 as the ASDSF is  $\geq 0.01$ . D125 is an easy dataset  
30 time- and resource-intensive tasks, a thorough 62 with an expected clear, single likelihood peak.  
31 exploration of their connection to difficulty 63 The difficulty according to our definition is low  
32 prediction is beyond the scope of this work. 64 ( $\ll 0.1$ ) and MrBayes appears to converge: the



## Phylogenetic Difficulty Prediction

---

ASDSF value drops below 0.01 after 150000 generations and is  $\ll 0.01$  after only 1 million generations. D27 exhibits at least two distinct likelihood peaks, suggesting that the MSA is rather difficult to analyze (Lakner *et al.* 2008). The difficulty according to our definition is 0.45 and after 10 million generations MrBayes reports an ASDSF of 0.011, indicating that the MCMC did not converge to a single local optimum. D354 exhibits a rugged likelihood surface (Grimm *et al.* 2006), so we expect a high difficulty and no convergence. The assigned difficulty for D354 is 0.6 and after 10 million generations the ASDSF is 0.009. According to MrBayes this suggests convergence and adding more generations should improve the ASDSF. However, we observe that the ASDSF did not improve during the last 2 million generations, and adding more generations did not further improve the ASDSF. D125 with 125 taxa and approximately 30000 sites is a larger dataset than D354 with 354 taxa and only 460 sites. Yet, D125 converges after 1 million generations, while for D354 the ASDSF drops below 0.01 only after 8 million generations. The smallest dataset D27 with 27 taxa and 1940 sites indicates no convergence after 10 million generations according to the ASDSF. We thus suspect that the number of generations required for the MCMC is correlated to the difficulty rather than to the size of the dataset.

*Bootstrap Support Values*

As already mentioned, the perhaps most common question on the RAxML user support Google group is related to disappointingly low support values. We expect the difficulty, and thus the vastness of the tree space, to correlate with the support values of the best-known tree in a subsequent bootstrapping analysis. We use the same MSAs for the same reasons as for the exploratory MCMC convergence prediction conducted above: D27, D125, and D354. For each MSA, we run RAxML-NG using its `--all` execution mode. This mode infers 20 ML trees for the MSA, infers bootstrap replicate trees, and draws support values on the tree with the highest log-likelihood (best-known tree). Per default, RAxML-NG infers at most 1000 bootstrap replicates, but implements an early-stopping criterion that determines convergence based on the bootstopping criterion presented by Pattengale *et al.* (2010). To explore the correlation between the difficulty prediction value and the bootstrap support values, we compute the average and standard deviation  $\mu \pm \sigma$  of bootstrap support values on the respective best-known trees. As stated above, D125 is an easy dataset exhibiting a clear signal with an assigned difficulty  $\ll 0.1$ . This is reflected by the high bootstrap support values:  $\mu \pm \sigma = 97.64 \pm 8.38 \%$ . The assigned difficulty for D27 is 0.45 and RAxML-NG reports the bootstrap support values as  $\mu \pm \sigma = 51.5 \pm 29.02 \%$ . Dataset D354 is the most difficult among the three

1 example MSAs with a predicted difficulty of  
2 0.6. Hence, the bootstrap support values are  
3 the lowest among the three MSAs with  $\mu \pm \sigma =$   
4  $43.41 \pm 32.48\%$ .

## 5 **Materials and Methods**

6 We formulate the difficulty prediction challenge  
7 as a supervised regression task. The goal is to  
8 predict the difficulty on a scale ranging between  
9 0.0 (easy) to 1.0 (difficult). We face two main  
10 challenges: (i) obtaining a sufficiently large set  
11 of MSAs to train Pythia on, ideally consisting of  
12 empirical MSAs, and (ii) obtaining ground-truth  
13 difficulties that represent the actual difficulty of  
14 the training data. In the following, we present how  
15 we obtain the training data and assign ground-  
16 truth difficulties. We further present our trained  
17 regression model, and finally present our heuristic  
18 for regularly retraining the regression model to  
19 continuously improve the prediction accuracy of  
20 Pythia.

### 21 **Quantification of Difficulty**

22 In order to train a reliable difficulty predictor,  
23 we need a reliable ground-truth label for each  
24 training datum. To obtain such labels, we require  
25 a quantifiable difficulty definition. To stringently  
26 quantify the difficulty of an MSA, we would  
27 have to explore the entire tree space. Since  
28 this is computationally not feasible, we need to  
29 rely on a heuristic definition. Our heuristic to  
30 quantify the difficulty is based on 100 ML tree  
31 inferences. In our analyses, we use RAxML-NG.

32 First, we infer  $N_{\text{all}} = 100$  ML trees and compute  
33 the average pairwise relative RF-Distance between  
34 all trees ( $RF_{\text{all}}$ ), as well as the number of unique  
35 topologies among the 100 inferred trees ( $N_{\text{all}}^*$ ).  
36 We determine the best tree among the 100  
37 inferred trees according to the log-likelihood, and  
38 compare all trees to this best tree using statistical  
39 significance tests. We assign trees that are not  
40 significantly worse than the best tree to a so-  
41 called *plausible tree set*. In our analyses, we use  
42 the statistical significance tests as implemented  
43 in the IQ-TREE software package (Minh *et al.*  
44 2020). Due to the continuing debate about the  
45 most appropriate significance test for comparing  
46 phylogenetic trees, we use the approach suggested  
47 by Morel *et al.* (2020): we only include trees that  
48 pass *all* significance tests in the plausible tree set.  
49 We further refer to the number of trees in this  
50 plausible tree set as  $N_{\text{pl}}$ . We compute the average  
51 pairwise relative RF-Distances between trees in  
52 the plausible tree set ( $RF_{\text{pl}}$ ), as well as the number  
53 of unique topologies ( $N_{\text{pl}}^*$ ). Finally, we compute  
54 the difficulty of the dataset based on the following  
55 formula:

$$\text{difficulty} = \frac{1}{5} \cdot \left[ RF_{\text{all}} + RF_{\text{pl}} \right] \quad (1)$$

$$+ \frac{N_{\text{all}}^*}{N_{\text{all}}} + \frac{N_{\text{pl}}^*}{N_{\text{pl}}} \quad (2)$$

$$+ \left( 1 - \frac{N_{\text{pl}}}{N_{\text{all}}} \right) \quad (3)$$

56 The reasoning for expression (1) is that if the  
57 RF-Distance is high, the tree space consists of

## Phylogenetic Difficulty Prediction

---

1 multiple distinct, locally optimal tree topologies 33 training data consists of 3250 MSAs, of which 74%  
2 which characterize a dataset that is difficult to 34 contain DNA data and 26% contain Amino Acid  
3 analyze. With expression (2) the reasoning is that 35 (AA) data. The training data includes partitioned  
4 the tree surface becomes more rugged, the more 36 and unpartitioned MSAs. We provide a detailed  
5 distinct locally optimal tree topologies the tree 37 overview of the training data in Supplementary  
6 inference yields, and the more tree topologies 38 Section 1. We include DNA and AA data in  
7 are not significantly different from the best tree. 39 the same setup as, according to our analyses,  
8 Finally, the rationale for expression (3) is that, 40 the prediction behaves analogously on both data  
9 the more tree inferences yield a plausible tree, 41 types. We provide a more thorough justification  
10 the more informative the MSA will be about the 42 of this equal treatment of DNA and AA data  
11 underlying evolutionary process and the easier the 43 in Supplementary Section 5. Note that while we  
12 MSA will be to analyze. Each term is a value 44 include partitioned MSAs in our training data,  
13 between 0.0 and 1.0, leading to an average value 45 we compute all features across the entire MSA  
14 between 0.0 and 1.0 that quantifies the overall 46 regardless of the defined partitions. The high  
15 difficulty. 47 feature importance of the parsimony tree based

16 For each MSA in our training data, we compute 48 features, as well as the entropy that are all  
17 the difficulty according to this definition. 49 partition-agnostic, justifies this choice.

18 To this end, we implement a training data 50 Figure 1 depicts the workflow for training  
19 generation pipeline that automatically performs 51 data generation. For each MSA, we compute the  
20 all required tree inferences, statistical tests, 52 difficulty according to the above definition as  
21 and computes the difficulty label alongside 53 ground-truth label for supervised training using  
22 the features required for training Pythia. We 54 the training data generation pipeline. We compute  
23 implement this pipeline using the Snakemake 55 the corresponding prediction features using our  
24 workflow management system (Köster and 56 Python library. The set of prediction features  
25 Rahmann 2012) and Python 3. The pipeline code 57 and the corresponding difficulty label form our  
26 is available at <https://github.com/tschuelia/> 58 training data. For training the regression model,  
27 `difficulty-prediction-training-data`. In 59 we split this training data into two sets: a  
28 Supplementary Section 6 we list the software 60 training set and a test set. The training set  
29 versions we use in the described pipeline. 61 comprises 80% of the training data and the test  
30 Training Data 62 set the remaining 20%. The test set is exclusively

31 We train Pythia using empirical MSAs obtained 63 used for evaluating the predictive power of the  
32 from TreeBASE (Piel *et al.* 2000). To date, our 64 difficulty predictor. To ensure an even distribution

1 of difficulty labels in the training and test sets, 33 difficulty labels do not sufficiently represent the  
2 we deploy stratified sampling. Stratified sampling 34 tree search behavior of the dataset, or b) 100  
3 splits all difficulty labels into disjoint subsets 35 tree inferences do not sufficiently sample the  
4 and draws random samples from each subset 36 tree space. To determine the impact of b), we  
5 independently. In principle, using simulated data 37 repeatedly sample 99 trees out of the 100 tree  
6 would allow us to increase the size of the 38 inferences and compute the consensus tree  $C_i$  of  
7 training data. However, since simulating data 39 the respective plausible tree set. We then assess  
8 that behaves analogously to empirical data under 40 the average RF-Distance between all consensus  
9 ML tree inferences constitutes a challenging task 41 trees  $C_i$ . For our training data, this RF-Distance is  
10 (Höhler *et al.* 2021), we decided against using any 42 on average  $8.1 \pm 14.5\%$ . We conclude that mostly  
11 simulated data. 43 b) causes the high topological distances between

## 12 Label Validation

13 Due to the lack of absolute ground-truth labels, 45 a high RF-Distance between the consensus trees  
14 we need to rely on the inferred difficulty labels. 46  $C_i$  for an MSA is correlated with its difficulty.  
15 The motivation of the difficulty prediction is to 47 The Spearman's rank correlation coefficient is  
16 limit the number of tree inferences required to 48 0.88 with a p-value of 0.0 ( $\ll 10^{-300}$ ). Thus, the  
17 sufficiently sample the tree space and obtain a 49 more difficult the MSA, the higher the topological  
18 representative consensus tree. To verify the label 50 distances between the consensus trees  $C_i$  will be.  
19 assignment for each dataset, we conduct two 51 The second analysis to justify our quantification  
20 analyses. First, we compare the consensus tree 52 of difficulty ensures that selecting the number  
21 obtained from the plausible tree set constructed 53 of tree inferences based on the difficulty does  
22 from all 100 ML tree inferences (*baseline tree*) 54 not negatively impact the quality of the tree  
23 to the consensus of the plausible trees we 55 inference. As stated above, the difficulty can, in  
24 obtain when inferring only  $100 * \text{difficulty}$  trees 56 general, not predict the number of tree searches  
25 (*prediction tree*). Note that for this analysis we use 57 required to sufficiently sample the tree space, as  
26 the *difficulty* we compute according to the above 58 this number also depends on the implemented  
27 definition rather than using a predicted difficulty. 59 tree inference heuristic. However, since we define  
28 We compare the topologies of the consensus 60 the difficulty based on 100 ML tree inference  
29 trees using the RF-Distance. The RF-Distance 61 in RAxML-NG, we can use the difficulty to  
30 between the *baseline tree* and the *prediction* 62 determine the number of required tree inferences  
31 *tree* is on average  $9.6 \pm 15.8\%$ . This noticeable 63 when again using RAxML-NG as a fraction  
32 topological difference suggests that either a) the 64 of 100. Thus, to analyze the influence of the

## Phylogenetic Difficulty Prediction

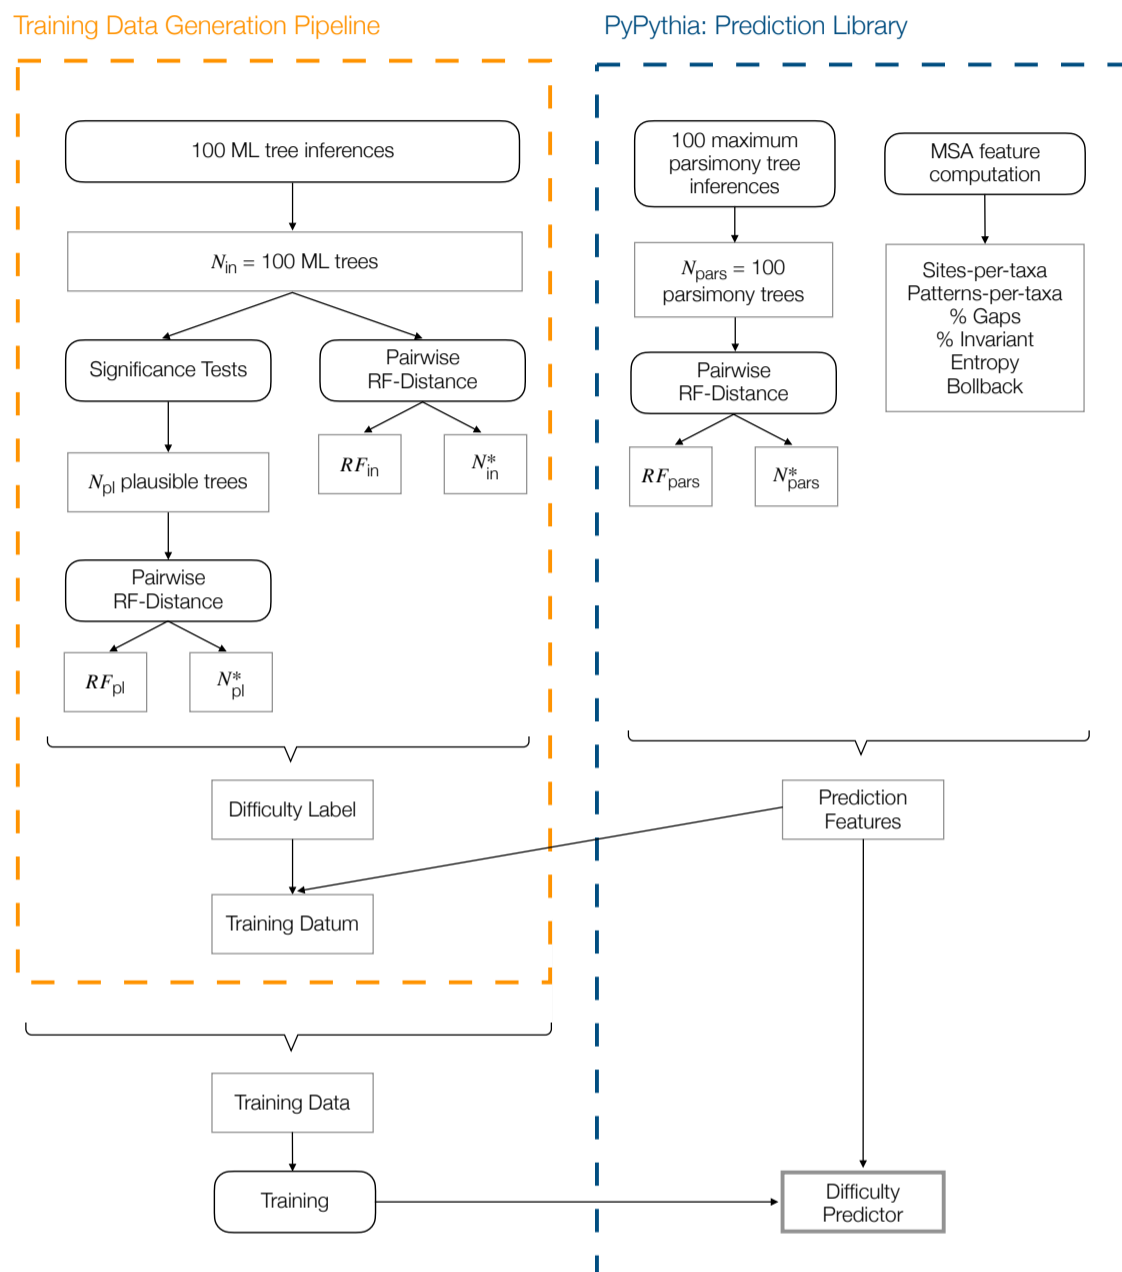

**FIG. 1.** Schematic depiction of the training data generation procedure. For each MSA, we compute the difficulty label based on our difficulty quantification using our training data generation pipeline (left dashed box). We further compute the prediction features using our Python prediction library PyPythia (right dashed box). Using the difficulty label and the corresponding prediction features for all MSAs in our training data, we train Pythia.

1 difficulty on the quality of the tree inference, we 6 data. We compare the respective best found log-  
 2 compare the log-likelihoods obtained from 100 7 likelihoods  $LnL_{100}^*$  and  $LnL_{diff}^*$ , as well as the  
 3 independent RAxML-NG tree searches ( $LnL_{s_{100}}$ ) 8 average log-likelihoods  $\overline{LnL}_{100}$  and  $\overline{LnL}_{diff}$ .  
 4 to the log-likelihoods of  $|difficulty \cdot 100|$  tree 9 For 81% of the MSAs, the best found log-  
 5 searches ( $LnL_{s_{diff}}$ ) for all MSAs in our training 10 likelihoods  $LnL_{100}^*$  and  $LnL_{diff}^*$  are identical. For  
 11 the remaining 19% of MSAs,  $LnL_{diff}^*$  is on average

1  $\ll 0.01\%$  worse than  $LnL_{100}^*$ . The average log- 33 algorithm for the task at hand, and outperforms  
2 likelihoods  $\overline{LnL}_{100}$  and  $\overline{LnL}_{diff}$  deviate on average 34 all other tested regression models according to  
3 by  $0.01\%$  only. 35 all our metrics. In Supplementary Information

4 This analysis only serves for justifying the 36 Section 3, we present the results for all trained  
5 definition of our difficulty quantification. 37 regression models. Random Forest Regression  
6 Predicting the number of tree inferences as 38 is an ensemble method that averages over the  
7 a fraction of 100 is only applicable to ML tree 39 predictions of multiple independently trained  
8 inference with RAxML-NG. It should further be 40 decision trees. To determine the optimal set  
9 mentioned, that RAxML-NG infers only 20 trees 41 of hyperparameters for the Random Forest  
10 by default and simply increasing the number of 42 Regression, we implemented a grid search that  
11 tree inferences to  $|difficulty \cdot 100|$  is discouraged. 43 tests various combinations of hyperparameter

12 Given these analyses, we conclude that our 44 values. For this grid search, we use an additional  
13 difficulty quantification is sufficiently accurate 45 validation set, obtained by further subdividing  
14 to capture the tree search complexity and the 46 the training set. We then perform hyperparameter  
15 behavior of an MSA under ML based phylogenetic 47 optimization using this validation set. Our final  
16 analysis. 48 difficulty predictor consists of 100 decision

17 Machine Learning and Evaluation 49 trees with a maximum depth of 10. To prevent

18 During our experiments, we trained distinct 50 overfitting, we set the minimum number of  
19 regression algorithms and compared their 51 samples in a leaf node to 10 and the minimum  
20 predictive power according to the  $R^2$  score, the 52 number of samples required for a split to 20.  
21 MSE, the MAE, and the MAPE. We divide the 53 Further, we train the individual decision trees  
22 training data into two sets: a training set and 54 on bootstrapped training data. We set the  
23 a test set. We use the training set to train the 55 sample size for the bootstrapping to 75% of the  
24 prediction algorithms and the test set to evaluate 56 training data size. Note that this bootstrapping  
25 the trained predictors on unseen data. We train 57 procedure samples the training data (features and  
26 multiple different regression models, namely 58 corresponding label) and is not the phylogenetic  
27 Linear Regression, Lasso Regression (Tibshirani 59 bootstrap.

28 1996), Random Forest Regression (Ho 1995), 60 Retraining the Model

29 Adaptive Boosting (AdaBoost) (Freund and 61 To continuously and automatically improve the  
30 Schapire 1996), and Support Vector Regression 62 prediction accuracy of Pythia, we regularly extend  
31 (Boser *et al.* 1992). Random Forest Regression 63 the training data set and subsequently retrain the  
32 proves to be the most suitable Machine Learning 64 predictor. We extend the training data using the

## Phylogenetic Difficulty Prediction

---

1 anonymized MSAs that we continuously obtain  
2 during our RAxML Grove database updates. Note  
3 that these MSAs are only available internally in  
4 RAxML Grove and are not publicly available.  
5 To limit the amount of resources required for  
6 retraining, we do not include every incoming,  
7 new MSA. We select MSAs based on a heuristic  
8 instead. At the time of writing, we select the set of  
9 new MSAs such that it diversifies the distribution  
10 of features in our training data. Algorithm 1  
11 shows the heuristic for deciding whether to use  
12 a given MSA for retraining. For each feature  
13  $f_i$ , we compute the respective histogram  $H_i$  on  
14 the training data using a predefined number  
15 of bins  $n_{\text{bins}}$ . Next, we compute the respective  
16 feature value for the given MSA and find the  
17 corresponding bin  $hist\_bin$  in the histogram  $H_i$ .  
18 The goal is to attain an even distribution of  
19 features, that is, all histogram bins should have  
20 the same height  $\bar{h}_i = 1/n_{\text{bins}}$ . To quantify the  
21 deviation  $v_i$  from this even distribution, we divide  
22 this desired height  $\bar{h}_i$  by the actual height  $h_i$  of  
23  $hist\_bin$ . The deviation  $v_i$  is negatively correlated  
24 to the number of samples in the corresponding  
25 histogram bin. For bins with fewer samples than  
26 the desired even distribution, the deviation is  $> 1$ .  
27 We sum the deviations  $v_i$  across all features. We  
28 use the given MSA for retraining if this sum is  $\geq 14$   
29 or any of the deviations  $v_i$  is  $\geq 4$ . The rationale for  
30 the first threshold is that in this case, on average,  
31 for each feature  $f_i$  the corresponding bin  $hist\_bin$   
32 has only half the desired height. The rationale for

33 the second threshold is that in this case, one of the  
34 feature bins has only 1/4-th of the desired height.

---

**Algorithm 1** Heuristic for deciding whether to  
use a given MSA for retraining Pythia.

---

```
foreach feature  $f_i$  do  
     $H_i = \text{histogram}(\text{training\_data}, f_i, n_{\text{bins}})$   
    feat = compute_feature_value(MSA)  
     $\bar{h}_i = 1/n_{\text{bins}}$   
    hist_bin = find_bin_for_value( $H_i$ , feat)  
     $h_i = \text{height}(\text{hist\_bin})$   
     $v_i = \bar{h}_i/h_i$   
end  
 $V = \sum v_i$   
analyze_msa =  $V \geq 14$  or  $\max(v_i) \geq 4$   
return analyze_msa
```

---

35 For all MSAs we select, we compute the ground-  
36 truth label and prediction features as described  
37 in the Training Data subsection. Based on this  
38 enlarged training data, we retrain Pythia and  
39 automatically update the trained predictor in our  
40 Python and C libraries.

### Code and Data availability

42 We provide Pythia as open source software  
43 libraries in C and Python. Both libraries include  
44 the trained Random Forest Regressor and  
45 the computation of the required prediction  
46 features. The C library CPythia is an  
47 addition to Coraxlib and is available at  
48 <https://github.com/tschuelia/CPythia>.

49 Additionally, we provide PyPythia, a lightweight,  
50 stand-alone Python library, including a

- 1 command line interface. PyPythia is available at 35  
2 <https://github.com/tschuelia/PyPythia>. 36 Available from: [https://codeberg.org/](https://codeberg.org/Exelixis-Lab/coraxlib)  
3 The implemented pipeline to compute 37 [Exelixis-Lab/coraxlib](https://codeberg.org/Exelixis-Lab/coraxlib).  
4 the prediction features and ground-truth 38 Farris, J. S. 1970. Methods for computing wagner trees.  
5 difficulty labels for the training data is 39 *Systematic Biology*, 19(1): 83–92.  
6 available at [https://github.com/tschuelia/](https://github.com/tschuelia/difficulty-prediction-training-data) 40 Fitch, W. M. 1971. Toward defining the course of evolution:  
7 [difficulty-prediction-training-data](https://github.com/tschuelia/difficulty-prediction-training-data). This 41 Minimum change for a specific tree topology. *Systematic*  
8 repository also contains the training data as 42 *Zoology*, 20(4): 406–416.  
9 parquet file. 43 Freund, Y. and Schapire, R. E. 1996. Experiments with  
10 **Supplementary Information** 44 a new boosting algorithm. In *Proceedings of the*  
11 Supplementary information is available online. 45 *Thirteenth International Conference on International*  
12 **Acknowledgments and Funding** 46 *Conference on Machine Learning*, ICML'96, p. 148–156,  
13 The authors gratefully acknowledge the support 47 San Francisco, CA, USA. Morgan Kaufmann Publishers  
14 of the Klaus Tschira Foundation. This project 48 Inc.  
15 has received funding from the European Union's 49 Grimm, G. W., Renner, S. S., Stamatakis, A., and  
16 Horizon 2020 research and innovation programme 50 Hemleben, V. 2006. A nuclear ribosomal DNA  
17 under the Marie Skłodowska-Curie grant 51 phylogeny of acer inferred with maximum likelihood,  
18 agreement No 764840. 52 splits graphs, and motif analysis of 606 sequences.  
19 **References** 53 *Evolutionary Bioinformatics*, 2.  
20 Bandelt, H.-J. and Dress, A. W. 1992. Split decomposition: 54 Heath, L. S. and Ramakrishnan, N. 2010. *Problem*  
21 A new and useful approach to phylogenetic analysis of 55 *Solving Handbook in Computational Biology and*  
22 distance data. *Molecular Phylogenetics and Evolution*, 56 *Bioinformatics*. Springer-Verlag, Berlin, Heidelberg, 1st  
23 1(3): 242–252. 57 edition.  
24 Bollback, J. P. 2002. Bayesian model adequacy and choice 58 Hedges, S. B., Moberg, K. D., and Maxson, L. R. 1990.  
25 in phylogenetics. *Molecular Biology and Evolution*, 59 Tetrapod phylogeny inferred from 18s and 28s ribosomal  
26 19(7): 1171–1180. 60 RNA sequences and a review of the evidence for amniote  
27 Boser, B. E., Guyon, I. M., and Vapnik, V. N. 1992. 61 relationships. *Molecular Biology and Evolution*, 7(6):  
28 A training algorithm for optimal margin classifiers. 62 607–633.  
29 In *Proceedings of the Fifth Annual Workshop on* 63 Ho, T. K. 1995. Random decision forests. In *Proceedings*  
30 *Computational Learning Theory*, COLT '92, p. 144– 64 *of 3rd International Conference on Document Analysis*  
31 152, New York, NY, USA. Association for Computing 65 *and Recognition*, volume 1, p. 278–282.  
32 Machinery. 66 Holland, B. R., Huber, K. T., Dress, A., and Moulton, V.  
33 Breiman, L. 2001. Random forests. *Machine Learning*, 67 2002.  $\delta$  plots: A tool for analyzing phylogenetic distance  
34 45(1): 5–32. 68 data. *Molecular Biology and Evolution*, 19(12): 2051–  
69 2059.  
70 Höhler, D., Pfeiffer, W., Ioannidis, V., Stockinger, H., and  
71 Stamatakis, A. 2021. RAxML Grove: an empirical  
72 phylogenetic tree database. *Bioinformatics*, 38(6):  
73 1741–1742.



## Phylogenetic Difficulty Prediction

---

- 1 Köster, J. and Rahmann, S. 2012. Snakemake—a scalable 40  
2 bioinformatics workflow engine. *Bioinformatics*, 28(19): 41  
3 2520–2522. 42
- 4 Lakner, C., van der Mark, P., Huelsenbeck, J. P., Larget, 43  
5 B., and Ronquist, F. 2008. Efficiency of markov chain 44  
6 monte carlo tree proposals in bayesian phylogenetics. 45  
7 *Systematic Biology*, 57(1): 86–103. 46
- 8 Lyons-Weiler, J., Hoelzer, G. A., and Tausch, R. J. 1996. 47  
9 Relative apparent synapomorphy analysis (RASA). I: 48  
10 The statistical measurement of phylogenetic signal. 49  
11 *Molecular Biology and Evolution*, 13(6): 749–757. 50
- 12 Minh, B. Q., Schmidt, H. A., Chernomor, O., Schrempf, 51  
13 D., Woodhams, M. D., von Haeseler, A., and Lanfear, 52  
14 R. 2020. IQ-TREE 2: New models and efficient methods 53  
15 for phylogenetic inference in the genomic era. *Molecular* 54  
16 *Biology and Evolution*, 37(5): 1530–1534. 55
- 17 Misof, B., Meusemann, K., von Reumont, B. M., Kück, 56  
18 P., Prohaska, S. J., and Stadler, P. F. 2014. A priori 57  
19 assessment of data quality in molecular phylogenetics. 58  
20 *Algorithms for Molecular Biology*, 9(1): 22. 59
- 21 Morel, B., Barbera, P., Czech, L., Bettisworth, B., Hübner, 60  
22 L., Lutteropp, S., Serdari, D., Kostaki, E.-G., Mamais, 61  
23 I., Kozlov, A. M., Pavlidis, P., Paraskevis, D., and 62  
24 Stamatakis, A. 2020. Phylogenetic analysis of sars-cov-2 63  
25 data is difficult. *Molecular Biology and Evolution*, 38(5): 64  
26 1777–1791. 65
- 27 Pattengale, N. D., Alipour, M., Bininda-Emonds, O. R., 66  
28 Moret, B. M., and Stamatakis, A. 2010. How 67  
29 many bootstrap replicates are necessary? *Journal of* 68  
30 *Computational Biology*, 17(3): 337–354. 69
- 31 Piel, W., Donoghue, M., Sanderson, M., and Person, C. 70  
32 2000. Treebase: A database of phylogenetic information. 71
- 33 Poulakakis, N. and Stamatakis, A. 2010. Recapitulating 72  
34 the evolution of afrotheria: 57 genes and rare genomic 73  
35 changes (RGCs) consolidate their history. *Systematics* 74  
36 *and Biodiversity*, 8(3): 395–408. 75
- 37 Price, M. N., Dehal, P. S., and Arkin, A. P. 2010. FastTree 76  
38 2 – approximately maximum-likelihood trees for large 77  
39 alignments. *PLOS ONE*, 5(3): 1–10. 78
- 40 Robinson, D. and Foulds, L. 1981. Comparison of 79  
41 phylogenetic trees. *Mathematical Biosciences*, 53(1): 80  
42 131–147. 81
- 43 Ronquist, F., Teslenko, M., van der Mark, P., Ayres, D. L., 82  
44 Darling, A., Höhna, S., Larget, B., Liu, L., Suchard, 83  
45 M. A., and Huelsenbeck, J. P. 2012. MrBayes 3.2: 84  
46 Efficient bayesian phylogenetic inference and model 85  
47 choice across a large model space. *Systematic Biology*, 86  
48 61(3): 539–542. 87
- 49 Rosenberg, M. S. and Kumar, S. 2001. Incomplete 88  
50 taxon sampling is not a problem for phylogenetic 89  
51 inference. *Proceedings of the National Academy of* 90  
52 *Sciences*, 98(19): 10751–10756. 91
- 53 Shannon, C. E. 1948. A mathematical theory of 92  
54 communication. *The Bell System Technical Journal*, 93  
55 27(3): 379–423. 94
- 56 Stamatakis, A. 2011. *Phylogenetic Search Algorithms for* 95  
57 *Maximum Likelihood*, chapter 25, p. 547–577. John 96  
58 Wiley & Sons, Ltd. 97
- 59 Stamatakis, A. 2014. RAxML version 8: a tool 98  
60 for phylogenetic analysis and post-analysis of large 99  
61 phylogenies. *Bioinformatics*, 30(9): 1312–1313. 100
- 62 Tibshirani, R. 1996. Regression shrinkage and selection via 101  
63 the lasso. *Journal of the Royal Statistical Society. Series* 102  
64 *B (Methodological)*, 58(1): 267–288. 103
- 65 Vinh, L. S. and von Haeseler, A. 2004. IQPNNI: moving 104  
66 fast through tree space and stopping in time. *Molecular* 105  
67 *Biology and Evolution*, 21(8): 1565–1571. 106
- 68 White, W., Hills, S., Gaddam, R., Holland, B., and Penny, 107  
69 D. 2007. Treeness triangles: Visualizing the loss of 108  
70 phylogenetic signal. *Molecular Biology and Evolution*, 109  
71 24(9): 2029–2039. 110
- 72 Yang, Z., Goldman, N., and Friday, A. 1995. Maximum 111  
73 likelihood trees from DNA sequences: A peculiar 112  
74 statistical estimation problem. *Systematic Biology*, 44: 113  
75 384–399. 114
